# Supplementary material for: Cholesterol esterification in plasma as a biomarker for liver function and prediction of mortality
Source: Springer Nature journal article supplement (doi:10.1186/s12876-017-0614-9), 2017-04-20
Supplement: MOESM1 [file 12237060]

**Supplemental Data for “Cholesterol esterification in plasma as a biomarker for liver function and prediction of mortality”**

**Authors:** Thorsten Kaiser<sup>1</sup>; Benedict Kinny-Köster<sup>1</sup>; Michael Bartels<sup>2</sup>, Thomas Berg<sup>3</sup>, Markus Scholz<sup>4</sup>; Cornelius Engelmann<sup>3</sup>; Daniel Seehofer<sup>2</sup>; Susen Becker<sup>1,5</sup>; Uta Ceglarek<sup>1,5</sup>; Joachim Thiery<sup>1,5</sup>

<sup>1</sup> Institute of Laboratory Medicine, Clinical Chemistry and Molecular Diagnostics, University Hospital Leipzig, Germany

<sup>2</sup> Department of Visceral, Vascular, Thoracic and Transplant Surgery, University Hospital Leipzig, Germany

<sup>3</sup> Section of Hepatology, Department of Gastroenterology and Rheumatology, University Hospital Leipzig, Leipzig, Germany

<sup>4</sup> Institute for Medical Informatics, Statistics and Epidemiology (IMISE), University Hospital Leipzig, Leipzig, Germany

<sup>5</sup> LIFE – Leipzig Research Center for Civilization Diseases, University Hospital Leipzig, Germany

**Corresponding Author:**

Dr. med. Thorsten Kaiser

Institute of Laboratory Medicine, Clinical Chemistry and Molecular Diagnostics

University Hospital Leipzig

Paul-List-Str. 13-15

04103 Leipzig

Germany

Telephone: +49 341 9722200

Fax: +49 341 22209

E-mail: [thorsten.kaiser@medizin.uni-leipzig.de](mailto:thorsten.kaiser@medizin.uni-leipzig.de)

22    **Table of contents**

|    |                                                                                                                                       |    |
|----|---------------------------------------------------------------------------------------------------------------------------------------|----|
| 23 | Comparison of laboratory results according to 3-month and 1-year-mortality .....                                                      | 3  |
| 24 | Details of clinical significance of CE in context of sex and aging effect .....                                                       | 5  |
| 25 | Comparison of CE fraction measured in serum vs. citrate plasma .....                                                                  | 7  |
| 26 | Calculation of the CE-MELD .....                                                                                                      | 8  |
| 27 | Substitution of the INR in the MELD score by the cholesterol esterification rate .....                                                | 9  |
| 28 | Correlation between the original MELD score and the CE based MELD score.....                                                          | 11 |
| 29 | Characteristics of the patient who was excluded from further analysis after the intake of an oral factor Xa inhibitor was proven..... | 12 |

30

31

32

33

34 **Comparison of laboratory results according to 3-month and 1-year-mortality**

35 Tables S1 and S2 summarize the laboratory parameters according to three-month and one-year mortality.

| 3-month mortality | Patients age [days] | Bilirubin [μmol/l] | Creatinine [μmol/l] | INR | MELD | MELDNa | CE-MELD | Sodium [mmol/l] | Free cholesterol [mg/l] | Cholesterol ester [mg/l] | Total cholesterol [mg/l] | CE-rate |      |
|-------------------|---------------------|--------------------|---------------------|-----|------|--------|---------|-----------------|-------------------------|--------------------------|--------------------------|---------|------|
|                   | n.s.                | ***                | n.s.                | *** | ***  | ***    | ***     | *               | *                       | ***                      | ***                      | ***     |      |
| No                | Median              | 21027              | 28                  | 76  | 1.3  | 11     | 14      | 11              | 138                     | 540                      | 1575                     | 2144    | 0.74 |
|                   | Mean                | 20550              | 43                  | 83  | 1.3  | 13     | 15      | 12              | 137                     | 593                      | 1571                     | 2163    | 0.72 |
|                   | N                   | 127                | 127                 | 127 | 127  | 127    | 126     | 127             | 126                     | 127                      | 127                      | 127     | 127  |
|                   | Std. Deviation      | 3360               | 48                  | 27  | 0.3  | 5      | 5       | 5               | 4                       | 245                      | 490                      | 686     | 0.06 |
| Yes               | Median              | 21347              | 105                 | 94  | 2.0  | 23     | 26      | 26              | 134                     | 338                      | 472                      | 810     | 0.56 |
|                   | Mean                | 20645              | 121                 | 124 | 2.1  | 24     | 27      | 26              | 133                     | 464                      | 586                      | 1050    | 0.54 |
|                   | N                   | 10                 | 10                  | 10  | 10   | 10     | 9       | 10              | 9                       | 10                       | 10                       | 10      | 10   |
|                   | Std. Deviation      | 4243               | 72                  | 88  | 0.5  | 5      | 3       | 5               | 9                       | 276                      | 402                      | 674     | 0.05 |
| total             | Median              | 21079              | 29                  | 77  | 1.3  | 12     | 14      | 11              | 138                     | 536                      | 1547                     | 2115    | 0.73 |
|                   | Mean                | 20557              | 48                  | 86  | 1.4  | 13     | 15      | 13              | 137                     | 583                      | 1499                     | 2082    | 0.71 |
|                   | N                   | 137                | 137                 | 137 | 137  | 137    | 135     | 137             | 135                     | 137                      | 137                      | 137     | 137  |
|                   | Std. Deviation      | 3413               | 54                  | 36  | 0.4  | 6      | 6       | 6               | 4                       | 248                      | 547                      | 742     | 0.08 |

36 **Table S1:** Laboratory parameters according to three-month mortality: sodium levels sodium levels were unavailable in two cases. Four patients

37 were censored because of liver transplantation within three month. Significance was calculated using independent samples Mann-Whitney-U-test

38 (n.s. = not significant; \* =  $p < 0.05$ ; \*\* =  $p < 0.01$ ; \*\*\* =  $p < 0.001$ ).

39

| 1-year mortality | Patients age [days] | Bilirubin [μmol/l] | Creatinine [μmol/l] | INR | MELD | MELDNa | CE-MELD | Sodium [mmol/l] | Free cholesterol [mg/l] | Cholesterol ester [mg/l] | Total cholesterol [mg/l] | CE-rate |      |
|------------------|---------------------|--------------------|---------------------|-----|------|--------|---------|-----------------|-------------------------|--------------------------|--------------------------|---------|------|
|                  | n.s.                | ***                | *                   | *** | ***  | ***    | ***     | *               | n.s.                    | ***                      | ***                      | ***     |      |
| no               | Median              | 20779              | 27                  | 75  | 1.2  | 11     | 13      | 11              | 138                     | 553                      | 1626                     | 2182    | 0.74 |
|                  | Mean                | 20356              | 40                  | 79  | 1.3  | 12     | 14      | 12              | 137                     | 599                      | 1614                     | 2213    | 0.73 |
|                  | N                   | 103                | 103                 | 103 | 103  | 103    | 103     | 103             | 103                     | 103                      | 103                      | 103     | 103  |
|                  | Std. Deviation      | 3414               | 49                  | 24  | 0.3  | 4      | 5       | 5               | 4                       | 250                      | 488                      | 689     | 0.06 |
| yes              | Median              | 21083              | 52                  | 94  | 1.6  | 20     | 23      | 19              | 136                     | 497                      | 998                      | 1531    | 0.65 |
|                  | Mean                | 20704              | 83                  | 107 | 1.7  | 19     | 22      | 20              | 135                     | 548                      | 1035                     | 1582    | 0.63 |
|                  | N                   | 25                 | 25                  | 25  | 25   | 25     | 23      | 25              | 23                      | 25                       | 25                       | 25      | 25   |
|                  | Std. Deviation      | 3599               | 65                  | 62  | 0.5  | 6      | 6       | 7               | 6                       | 272                      | 594                      | 838     | 0.09 |
| total            | Median              | 20864              | 29                  | 76  | 1.3  | 12     | 14      | 11              | 138                     | 543                      | 1555                     | 2122    | 0.73 |
|                  | Mean                | 20424              | 49                  | 85  | 1.4  | 13     | 15      | 13              | 137                     | 589                      | 1501                     | 2090    | 0.71 |
|                  | N                   | 128                | 128                 | 128 | 128  | 128    | 126     | 128             | 126                     | 128                      | 128                      | 128     | 128  |
|                  | Std. Deviation      | 3439               | 55                  | 36  | 0.4  | 6      | 6       | 6               | 4                       | 254                      | 558                      | 760     | 0.08 |

41 **Table S2:** Laboratory parameters according to 1-year mortality: sodium levels were unavailable in two cases. 13 patients were censored because  
42 of liver transplantation within one year. Significance was calculated using independent samples Mann-Whitney-U-test (n.s. = not significant; \* = p <  
43 0.05; \*\*= p < 0.01; \*\*\*= p < 0.001).

45 **Details of clinical significance of CE in context of sex and aging effect**

46 Tables S3 and S4 characterize CE fraction and other relevant parameters in the context of sex and aging.

|                                     | Sex   |        |         |         |    |       |        |         |         |    |       |
|-------------------------------------|-------|--------|---------|---------|----|-------|--------|---------|---------|----|-------|
|                                     | Women |        |         |         |    | Men   |        |         |         |    |       |
|                                     | Mean  | Median | Minimum | Maximum | n  | Mean  | Median | Minimum | Maximum | n  |       |
| bilirubin [μmol/L]                  | 57.0  | 29.0   | 4.5     | 346.6   | 52 | 48.4  | 29.4   | 5.7     | 336.3   | 89 | 0.625 |
| creatinine [μmol/L]                 | 82    | 69     | 44      | 313     | 52 | 91    | 80     | 41      | 329     | 89 | 0.011 |
| INR                                 | 1.5   | 1.3    | .9      | 3.4     | 52 | 1.4   | 1.3    | .9      | 4.3     | 89 | 0.640 |
| sodium [mmol/l]                     | 136.9 | 137.7  | 125.8   | 151.0   | 52 | 136.6 | 137.7  | 117.0   | 145.6   | 89 | 0.930 |
| MELD                                | 13.9  | 11.5   | 6.4     | 39.6    | 52 | 13.6  | 11.8   | 6.4     | 37.2    | 89 | 0.601 |
| MELDNa                              | 15.7  | 14.0   | 6.0     | 40.0    | 52 | 15.5  | 14.2   | 6.0     | 31.3    | 89 | 0.793 |
| total cholesterol [mg/dl]           | 230.6 | 231.2  | 46.9    | 493.7   | 52 | 191.6 | 190.2  | 41.3    | 294.7   | 89 | 0.003 |
| cholesterol ester [mg/dl]           | 164.3 | 174.6  | 17.0    | 310.6   | 52 | 138.7 | 144.3  | 7.7     | 222.1   | 89 | 0.003 |
| Cholesterol esterification fraction | .69   | .72    | .32     | .80     | 52 | .71   | .74    | .19     | .80     | 89 | 0.269 |

47 **Table S3:** Result of parameters according to sex of the patients.

48

49

|                                     | Group according to the median age of 57.7 years |        |         |         |    |              |        |         |         |    |       |
|-------------------------------------|-------------------------------------------------|--------|---------|---------|----|--------------|--------|---------|---------|----|-------|
|                                     | age < medium                                    |        |         |         |    | age ≥ medium |        |         |         |    |       |
|                                     | Mean                                            | Median | Minimum | Maximum | n  | Mean         | Median | Minimum | Maximum | n  |       |
| bilirubin [μmol/L]                  | 58.7                                            | 29.5   | 5.7     | 346.6   | 70 | 44.6         | 29.4   | 4.5     | 300.8   | 71 | 0.923 |
| creatinine [μmol/L]                 | 79                                              | 75     | 41      | 137     | 70 | 97           | 79     | 44      | 329     | 71 | 0.035 |
| INR                                 | 1.4                                             | 1.3    | .9      | 4.3     | 70 | 1.4          | 1.3    | .9      | 3.2     | 71 | 0.939 |
| sodium [mmol/l]                     | 136.8                                           | 137.4  | 125.8   | 143.3   | 70 | 136.7        | 137.9  | 117.0   | 151.0   | 71 | 0.985 |
| MELD                                | 13.4                                            | 11.6   | 6.4     | 37.2    | 70 | 13.9         | 12.2   | 6.4     | 39.6    | 71 | 0.583 |
| MELDNa                              | 15.2                                            | 14.0   | 6.0     | 32.0    | 70 | 15.9         | 15.0   | 6.0     | 40.0    | 71 | 0.714 |
| total cholesterol [mg/dl]           | 204.5                                           | 199.7  | 41.3    | 493.7   | 70 | 207.4        | 212.4  | 44.5    | 436.8   | 71 | 0.726 |
| cholesterol ester [mg/dl]           | 145.7                                           | 145.8  | 7.7     | 294.1   | 70 | 150.5        | 158.9  | 17.3    | 310.6   | 71 | 0.509 |
| Cholesterol esterification fraction | .70                                             | .73    | .19     | .80     | 70 | .71          | .73    | .32     | .80     | 71 | 0.740 |

50 **Table S4:** Comparison of the result for patients < vs ≥ median age. The median age in this cohort was 57.7 years.

51

52    **Comparison of CE fraction measured in serum vs. citrate plasma**

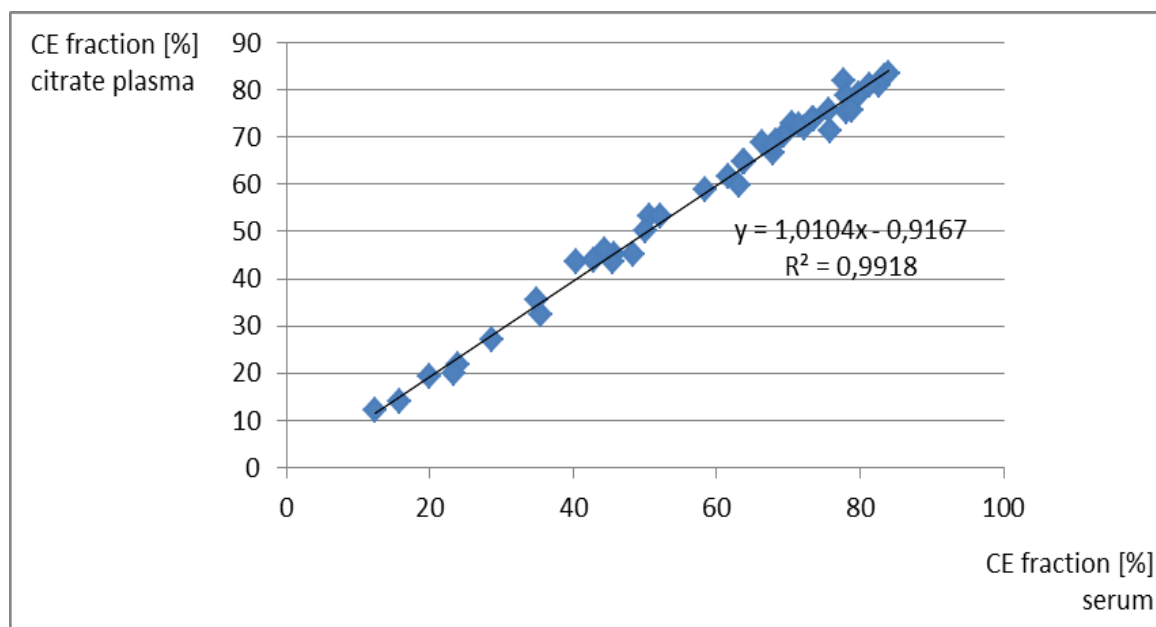

53

54    **Figure S1:** Comparison of CE fraction measured in citrate plasma vs. serum

55

56

57

## 59

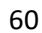

61

62

63



64    **Substitution of the INR in the MELD score by the cholesterol esterification rate**

65    To allow a direct comparison between the two biomarkers in the context of the MELD score and because of their close agreement, we tried to replace the INR  
66    in the MELD score with the cholesterol esterification fraction for further analysis. Based on the linear correlation curve we transformed the cholesterol  
67    esterification fraction into INR equivalents that were used for the calculation of the new CE-MELD score.

68    To prove the diagnostic power of the CE-MELD score in comparison to the conventional MELD score further ROC analysis was performed. For this analysis we  
69    included also the MELDNa score, which was described to have a superior diagnostic value compared to the conventional MELD score (Supplemental Figure 2).

70    For the prediction of three month survival CE-MELD was significantly superior to MELD ( $p = 0.02$ ). For the prediction of one-year survival both scores did not  
71    show significant differences ( $p > 0.05$ ).

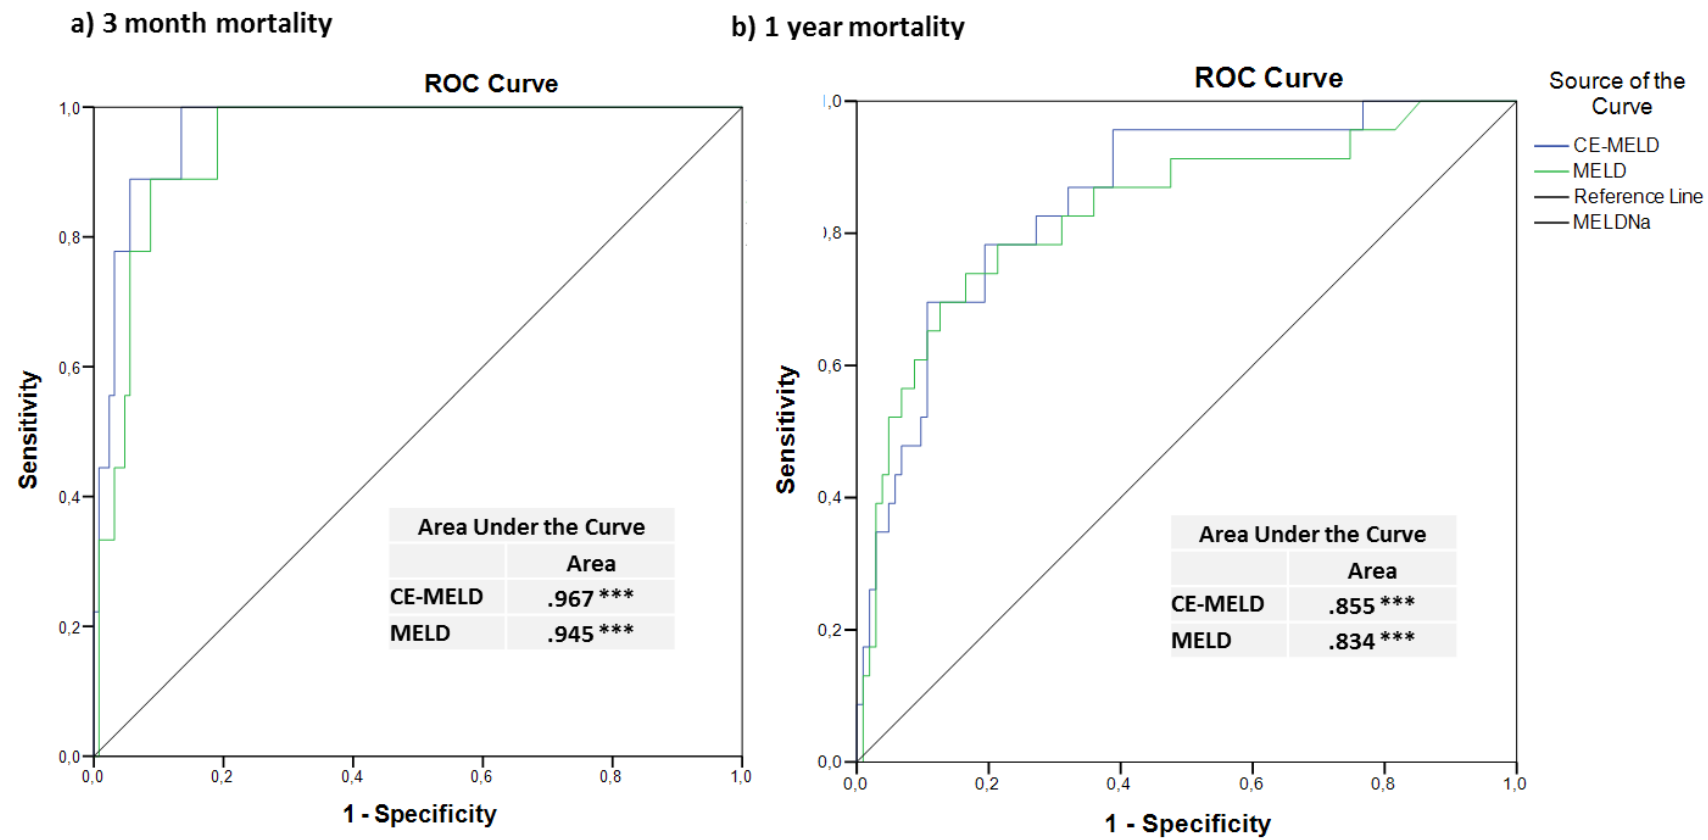

Diagonal segments are produced by ties.

72

73 **Figure S2:** ROC analysis of the prognostic scores: MELD.. CE-MELD and MELDNa for three month and one-year mortality (\*\*=  $p < 0.001$ ).

74 **Correlation between the original MELD score and the CE based MELD score.**

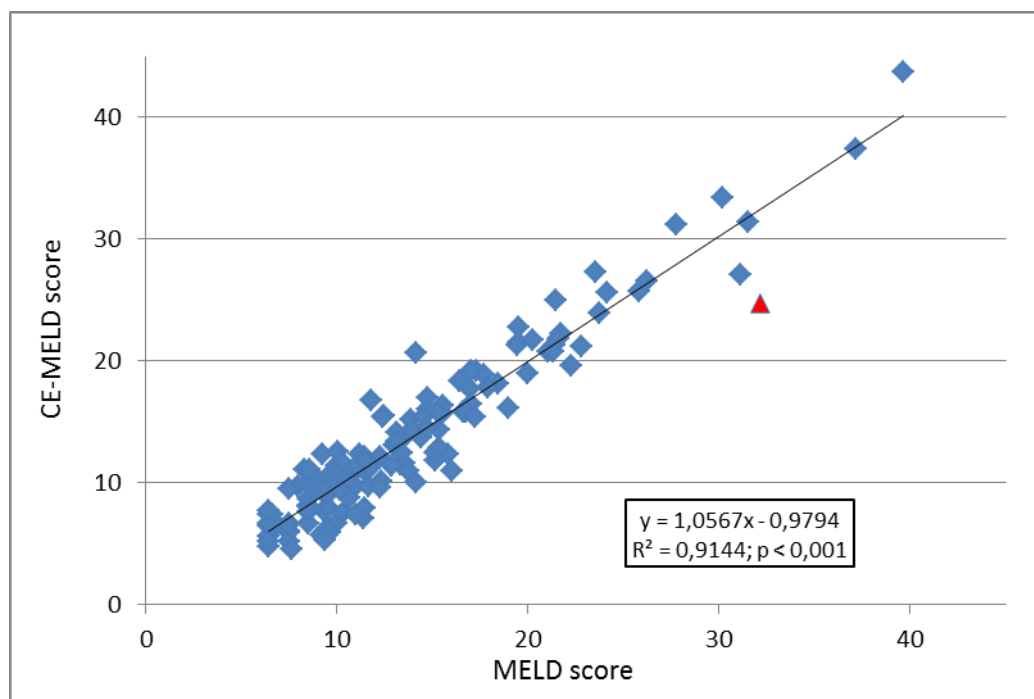

75

76 **Figure S3:** Resulting correlation between the original MELD score including INR and the CE-MELD score after substitution of INR.

77 The patient who received the direct factor Xa inhibitor (rivaroxaban) prior to MELD diagnostics is marked as a red triangle. This patient was  
78 excluded from all analysis including this regression analysis.

79

**Characteristics of the patient who was excluded from further analysis after the intake of an oral factor Xa inhibitor was proven**

The patient who was excluded from further analysis after the intake of the oral factor Xa inhibitor rivaroxaban was proven suffered from an acute decompensation of chronic ethyltoxic liver cirrhosis Child B. He was ethanol abstinence for >6 months. Rivaroxaban was given for therapeutic anticoagulation because of atrial fibrillation. The patient had been initially admitted to an external hospital with an initial INR of 5.4 under anticoagulation with rivaroxaban resulting in a MELD score of 39. Because of the high MELD score and the clinical decompensation the anticoagulation was stopped and the patient was transferred to the university hospital of Leipzig for further treatment and evaluation of liver transplantation. Already on the following day after discontinuation of rivaroxaban INR dropped to 3.7 resulting in a MELD score of 32. The corresponding CE-MELD showed only 25. 18 days later the patient had recovered and could be dismissed. At this time the MELD score was 16 and the INR 1.6. The corresponding CE-MELD showed 14 points. This case illustrates impressively the possible disturbance of the early conventional MELD score in the context of anticoagulation.
